# Supplementary material for: Proton reservoirs in polymer photocatalysts for superior H2O2 photosynthesis
Source: Royal Society of Chemistry journal article supplement (doi:10.1039/d3ee02200e), 2023-01-01
Supplement: d3ee02200e1.pdf [file d3ee02200e1.pdf]

## Supporting Information

### Proton Reservoir in Polymer Photocatalysts for the Superior H<sub>2</sub>O<sub>2</sub>

#### Photosynthesis

Bo Sheng,<sup>abc</sup> Yangen Xie,<sup>ab</sup> Qi Zhao,<sup>ab</sup> Hua Sheng\*<sup>ab</sup> and Jincui Zhao<sup>ab</sup>

<sup>a</sup> Key Laboratory of Photochemistry, Institute of Chemistry Chinese Academy of Sciences, Beijing National Laboratory for Molecular Sciences, Beijing 100190, P.R. China

<sup>b</sup> University of Chinese Academy of Sciences, Beijing 100049, P.R. China

<sup>c</sup> National & Local Joint Engineering Research Center for Deep Utilization Technology of Rock-salt Resource, Faculty of Chemical Engineering, Huaiyin Institute of Technology, Huai'an, Jiangsu 223003, P.R. China

## Table of Contents

|                                                                                                                                                                                                                                                                                                            |    |
|------------------------------------------------------------------------------------------------------------------------------------------------------------------------------------------------------------------------------------------------------------------------------------------------------------|----|
| Text S1 Chemicals.....                                                                                                                                                                                                                                                                                     | 1  |
| Text S2 Synthesis of Quinone-Amine polymers (QAPs).....                                                                                                                                                                                                                                                    | 1  |
| Text S3 Materials characterizations .....                                                                                                                                                                                                                                                                  | 1  |
| Text S4 Electrochemical tests .....                                                                                                                                                                                                                                                                        | 1  |
| Text S5 H <sub>2</sub> O <sub>2</sub> photosynthesis .....                                                                                                                                                                                                                                                 | 2  |
| Text S6 Radicals detection.....                                                                                                                                                                                                                                                                            | 3  |
| Text S7 Measurement of in-situ FTR analysis.....                                                                                                                                                                                                                                                           | 3  |
| Text S8 The application of QAP-based H <sub>2</sub> O <sub>2</sub> photosynthesis .....                                                                                                                                                                                                                    | 3  |
| <b>Fig. S1</b> Adsorption-desorption isotherms (a-d) and pore size distribution (e-h) of QAPs. ....                                                                                                                                                                                                        | 5  |
| <b>Fig. S2</b> The apparent quantum efficiency (AQY, left Y-axis) obtained through 420 nm illumination, and the solar-to-chemical conversion efficiency (SCC, right Y-axis) under AM 1.5 G irradiation for different QAP photocatalysts. ....                                                              | 6  |
| <b>Fig. S3</b> The characterization of QAP <sub>2</sub> after reaction by (a) SEM, (b) TGA, (c) FT-IR, and (d) XRD.....                                                                                                                                                                                    | 7  |
| <b>Fig. S4</b> Amounts of O <sub>2</sub> generated in WOR half photoreaction with NaIO <sub>3</sub> as an electron-scavenger. Conditions: water (50 mL), QAPs catalyst (10 mg), NaIO <sub>3</sub> (3 mM), Ar (1 bar), $\lambda > 420$ nm (Xe lamp). ....                                                   | 8  |
| <b>Fig. S5</b> The investigation for the decomposition of H <sub>2</sub> O <sub>2</sub> by QAPs under illumination. Conditions: 10 mg catalysts, 50 mL water, 100 $\mu$ M H <sub>2</sub> O <sub>2</sub> , 3 mM NaIO <sub>3</sub> , Ar (1 bar), $\lambda > 420$ nm (Xe lamp, 100 mW/cm <sup>2</sup> ). .... | 9  |
| <b>Fig. S6</b> The measurement of ROS species (a) O <sub>2</sub> <sup>•-</sup> and (b) <sup>•</sup> OH by EPR during the photosynthesis of H <sub>2</sub> O <sub>2</sub> . ....                                                                                                                            | 10 |
| <b>Fig. S7</b> Tauc plots (a-d), and Mott-Schottky curves (e-h) measured in 0.5 M Na <sub>2</sub> SO <sub>4</sub> solution. ....                                                                                                                                                                           | 11 |
| <b>Fig. S8</b> In situ IR spectra for pyridine adsorbed on QAPs collected at room temperature. ....                                                                                                                                                                                                        | 12 |
| <b>Fig. S9</b> The electron paramagnetic resonance (EPR) spectra of the QAPs in the dark conditions. ....                                                                                                                                                                                                  | 13 |
| <b>Table S1.</b> Specific surface area of the samples and the pore size fitted through BJH model.....                                                                                                                                                                                                      | 14 |
| <b>Table S2.</b> Comparison of metal-free polymer-based photocatalysts for non-sacrificial H <sub>2</sub> O <sub>2</sub> production. ....                                                                                                                                                                  | 15 |
| References .....                                                                                                                                                                                                                                                                                           | 16 |

## Text S1 **Chemicals**

Ethanol, sodium iodate, monobasic potassium phosphate, potassium phosphate, sulfuric acid, H<sub>2</sub>O<sub>2</sub>, ethyl acetate, benzyl alcohol, iron powder (Fe<sup>0</sup>) and tetracycline were analytic grade and acquired by Sino pharm Chemical Reagent Co., Ltd., China. 5,5-dimethyl-1-pyrroline-Noxide (DMPO) was purchase from Dojindo Laboratories. 2,2,6,6-Tetramethyl-4-piperidone hydrochloride (TEMP) was obtained from Tokyo Chemical Industry. N,N-Dimethylacetamide (DMAC), N,N-diethyl-1,4-phenylene-diamine (DPD), peroxidase (POD), polyvinylidene difluoride (PVDF), benzoquinone (BQ), and 3,3',4,4'-Tetraaminobiphenyl (DAB) were provided by Aladdin. The sponge was purchased from the Internet.

## Text S2 Synthesis of Quinone-Amine polymers (QAPs)

QAPs were synthesized via a facile precipitation polymerization method. Typically, 1 mmol of 3,3'-diaminobenzidine (DAB) was dissolved in ethanol (40 mL) with a round-bottomed flask, and then the mixture was heated to 70 °C. Subsequently, to obtained QAPs in different contents of hydroquinone units, varied amounts (1, 2, 4, 5 and 8 mmol for QAP<sub>1</sub>, QAP<sub>2</sub>, QAP<sub>4</sub>, QAP<sub>5</sub> and QAP<sub>8</sub>, respectively) of BQ (dissolved in 30 mL ethanol) was slowly added under stirring. After 8 h reaction, the obtained precipitants were separated and washed with ethyl acetate and ethanol. Finally, the brown solid samples was dried under vacuum at 60 °C overnight.

## Text S3 **Materials characterizations**

The scanning electron microscopy (SEM) images were performed on Hitachi S-4800 microscope. A Hitachi UV-vis spectrophotometer (UV-3900) equipped with an integrating sphere was used to record the UV-vis absorption of materials. BaSO<sub>4</sub> was selected as the reflectance standard. Time-resolved photoluminescence (TRPL) spectra were performed on a Hamamatsu Quantaaurus-TauC11367 spectrophotometer with an excitation wavelength at 365 nm at room-temperature. Powder X-ray diffraction (PXRD) patterns of the samples were collected on a analytical B.V. X-ray powder diffractometer with CuK $\alpha$  radiation (2 $\theta$  range from 5° to 45°). <sup>13</sup>C MAS NMR spectra were collected on a Bruker Avance III 400 MHz spectrometer at room temperature. The N<sub>2</sub> adsorption-desorption experiments were conducted on a Quantachrome Autosorb IQ Instruments. Electron paramagnetic resonance (EPR) spectra were recorded on a Bruker Elexsys E500-T spectrometer at room temperature.

## Text S4 **Electrochemical tests**

All electrochemical experiments were conducted on a CHI760E electrochemical workstation (CH Instrument Co.), using a standard three-electrode system in 0.5 M Na<sub>2</sub>SO<sub>4</sub> at room temperature. The Pt wire and Ag/AgCl electrode was used as the counter and reference electrodes, respectively. QAPs polymer (1.2 mg) were dispersed in 150 μL ethanol, and then 15 μL of Nafion solution (5 wt. %) was added into the dispersion followed by ultrasonic treatment for 30 min. 30 μL of the resultant ink was drop-coated onto a FTO glass, which was heated at 60 °C in vacuum overnight.

For RRDE measurements (Pine Research Instrument, USA), QAPs polymer (0.5 mg) were dispersed in 150 μL ethanol, and then 15 μL of Nafion solution (5 wt. %) was added to the dispersion followed by ultrasonic treatment for 10 min. 3 μL of the resultant ink was drop-coated onto a glassy carbon disk electrode (OD: 5.6 mm) and dried at room temperature. The linear sweep scan was conducted at 20 mV/s in O<sub>2</sub>-saturated 0.1 M phosphate buffer solution (pH = 7.0). The working electrode was rotated at a speed of 400, 700, 1000, 1300 and 1600 rpm, respectively. The electron transfer number (n) for oxygen reduction was calculated by Koutechy-Levich equation:

$$\frac{1}{j} = \frac{1}{j_k} + \frac{1}{B\omega^{0.5}}$$

$$B = 0.62 \times n \times F \times D_{O_2}^{2/3} \times \nu^{-1/6} \times C_{O_2}$$

where j is the current density, ω means the rotation speed, n is the number of electrons transferred during the reaction; D<sub>O<sub>2</sub></sub> and C<sub>O<sub>2</sub></sub> are diffusion coefficient of O<sub>2</sub> and bulk concentration of O<sub>2</sub>, respectively; F represents the Faraday constant and ν is the dynamic viscosity of the electrolyte.

### Text S5 H<sub>2</sub>O<sub>2</sub> photosynthesis

The H<sub>2</sub>O<sub>2</sub> photosynthesis on QAPs was conducted as follows: 10 mg of QAPs were dispersed in 50 mL pure water and sonicated for 2 min. After stirring in dark for 10 min, the obtained suspension was irradiated by a 300 W Xenon lamp (λ > 420 nm) with continuous air or pure O<sub>2</sub> flow (0.1 L·min<sup>-1</sup>), the temperature of photosynthesis system was controlled at 25 °C. 2 mL of suspension was filtrated with a 0.22 μm filtration membrane at desired intervals. The concentration of H<sub>2</sub>O<sub>2</sub> was measured by N,N-diethyl-1,4-phenylene-diamine (DPD) and peroxidase (POD) method.<sup>1</sup> The details were as follows: 2 mL sample was added into the mixture of 3 mL water and 0.4 mL phosphate buffer, followed by the addition of 50 μL DPD. Finally, the obtained solution was shaken after the addition of 50 μL POD, then the concentration of H<sub>2</sub>O<sub>2</sub> in the solution was determined by the absorbance at 551 nm in UV-vis spectrum.

The solar-to-chemical conversion (SCC) efficiency of photocatalytic H<sub>2</sub>O<sub>2</sub> production by QAPs was performed under simulated solar light irradiation (AM1.5 global spectrum). The SCC efficiency was calculated by the following equation:<sup>2</sup>

$$\text{SCC efficiency} = \frac{\Delta G^0 \times n(\text{H}_2\text{O}_2)}{(\text{total input energy}) \times (\text{reaction time})} \times 100\%$$

Where  $\Delta G^0$  is the free energy for  $\text{H}_2\text{O}_2$  generation ( $117 \text{ kJ}\cdot\text{mol}^{-1}$ ),  $n(\text{H}_2\text{O}_2)$  is the molar of the formed  $\text{H}_2\text{O}_2$  (mol), the overall irradiance of the AM1.5 global spectrum is  $1000 \text{ W}\cdot\text{m}^{-2}$ , and the irradiation area is about  $0.4 \times 10^{-4} \text{ m}^2$ .

To calculate the apparent quantum yield ( $\Phi\text{AQY}$ ), the incident light was passed through a monochromator. The  $\Phi\text{AQY}$  was calculated by the following equation:

$$\Phi\text{AQY} (\%) = \frac{\text{number of } \text{H}_2\text{O}_2 \text{ molecules} \times 2}{\text{number of incident photons}} \times 100\%$$

### Text S6 Radicals detection

In-situ experiments were conducted on a Bruker model electron spin resonance (ESR) E500-T spectrometer equipped with an external light resource. DMPO and TEMP were selected the spin trapper of  $^{\bullet}\text{OH}$  and  $\text{O}_2^{\bullet-}$ , respectively. Generally, 1 mL solution of catalyst ( $0.2 \text{ g}\cdot\text{L}^{-1}$ ) was added into a centrifugation tube followed by the addition of spin trapper (100 mM), after variously shaking, certain amounts of suspensions were loaded into a capillary tube and subsequently an NMR tube for the EPR measurement at room temperature. For the measurement of solid powders, 20 mg of QAPs was directly loaded into the NMR tube.

### Text S7 Measurement of in-situ FTIR analysis

In-situ Fourier transform infrared (FTIR) spectra were recorded on a Bruker Vertex 70 V spectrometer equipped with narrow-band HgCdTe detector cooled by liquid nitrogen. The diffusion IR mode (DRIFTS) was employed and connected to an evacuation line ( $\sim 0 \text{ hPa}$ ). The QAP sample was pressed into a pellet (7 mm in diameter) with  $\text{BaF}_2$  as diluent. The sample was placed into the DRIFTS chamber and evacuated overnight. During the IR measurement, dry  $\text{O}_2$  was first introduced to monitor the interaction between QAPs and  $\text{O}_2$ , after then, water-saturated  $\text{O}_2$  was used instead. After the dark interaction between QAPs and  $\text{O}_2$ /water reached an equilibrium, the illumination started.. The light resource was a 150 mW continuous diode laser (375 nm). The in-situ IR spectrum with a spectral resolution of  $4 \text{ cm}^{-1}$  and scanning velocity of 160 KHz was collected in both of the dark and illumination period.

### Text S8 The application of QAP-based $\text{H}_2\text{O}_2$ photosynthesis

To test the activity of QAP in real aquatic environment, tap water and natural water (collected

sample from the lake in Haidian Park, Beijing) was employed instead of deionized water ( $18.2 \text{ M}\Omega \cdot \text{cm}^{-1}$ ), the natural water was sampled from a lake in Haidian Park in Beijing.

To build up a floatable photocatalytic platform for the pollutant degradation, QAP was loaded on the floatable sponge supporter. To be specific, 0.3 g PVDF was dissolved in 20 mL DMAC solution and stirred for 1 h at  $50 \text{ }^\circ\text{C}$ , after then, 10 mL solution was transferred into centrifuge tube containing 100 mg QAP (mixture A), and 5 mL solution was transferred into centrifuge tube containing 100 mg  $\text{Fe}^0$  (mixture B). After shaking 3 mins, the mixture A and B was drop-coated on the upper and lower surface of sponge ( $6 \times 6 \text{ cm}^2$ ), respectively. During the degradation of tetracycline hydrochloride (TC, concentration:  $20 \text{ mg} \cdot \text{L}^{-1}$ ), the floated platform was upon the illumination of 300 W Xenon lamp ( $\lambda > 420 \text{ nm}$ ), and the concentration of the residue TC was determined by UV-Vis.

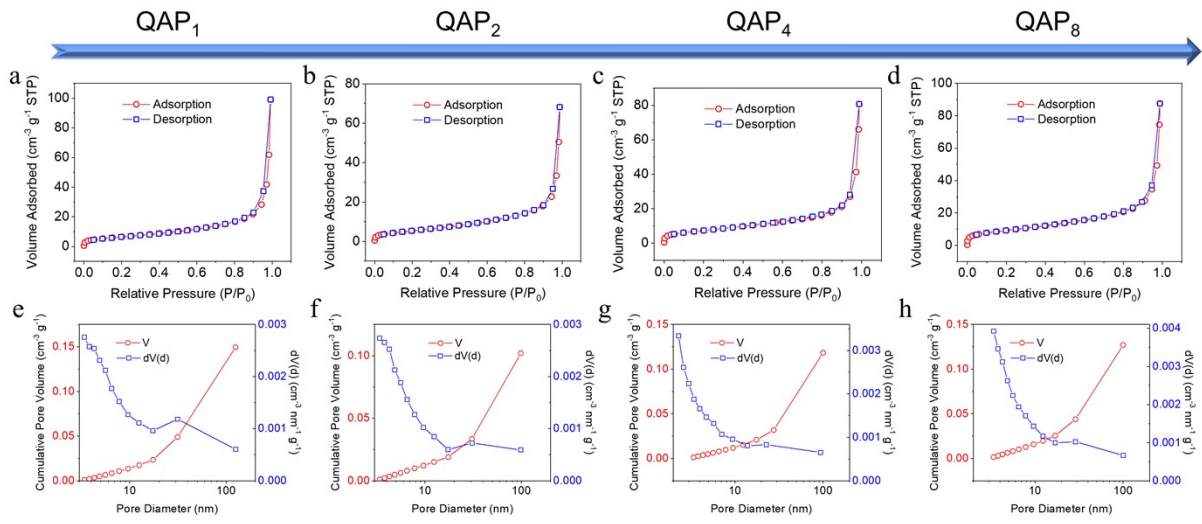

**Fig. S1** Adsorption-desorption isotherms (a-d) and pore size distribution (e-h) of QAPs.

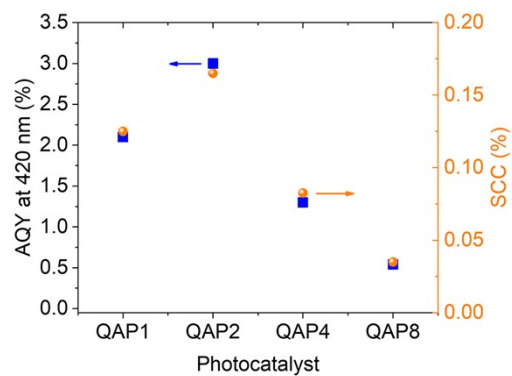

**Fig. S2** The apparent quantum efficiency (AQY, left Y-axis) obtained through 420 nm illumination, and the solar-to-chemical conversion efficiency (SCC, right Y-axis) under AM 1.5 G irradiation for different QAP photocatalysts.



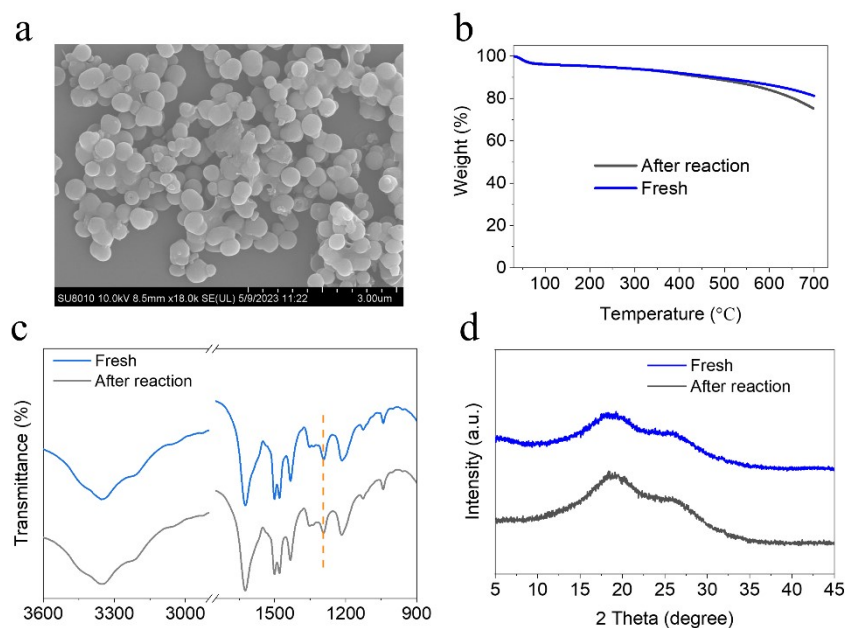

**Fig. S3** The characterization of QAP<sub>2</sub> after reaction by (a) SEM, (b) TGA, (c) FT-IR, and (d) XRD.

The catalyst after reaction have been systematically characterized. No significant alternation was observed in SEM image. In FT-IR spectra, all the characteristic bands in fresh samples were both observed after photocatalytic reaction with remained intensity ratios, specifically the hydroquinone units ( $1292\text{ cm}^{-1}$ ) were resistant to oxidation, preserving their integrity during the photoreactions. No significant alternation was detected in XRD patterns. These results firmly proved the stability of QAP photocatalysts.

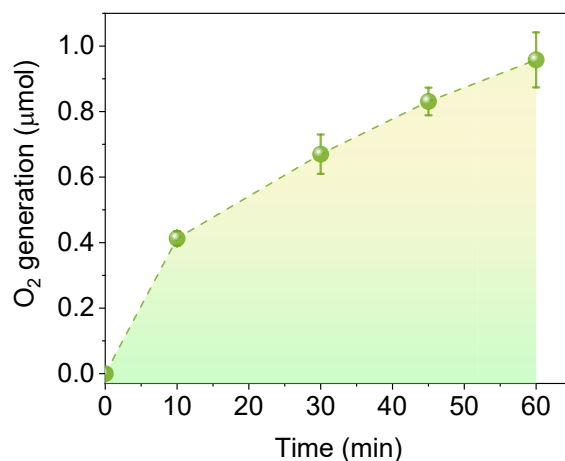

**Fig. S4** Amounts of O<sub>2</sub> generated in WOR half photoreaction with NaIO<sub>3</sub> as an electron-scavenger. Conditions: water (50 mL), QAPs catalyst (10 mg), NaIO<sub>3</sub> (3 mM), Ar (1 bar),  $\lambda > 420$  nm (Xe lamp).

To clarify the origin of H<sub>2</sub>O<sub>2</sub> produced by QAPs during photoreaction, we selected the QAP<sub>2</sub> as the target catalyst in half reactions with sacrificial reagents. With NaIO<sub>3</sub> as an electron-scavenger under Ar, the major WOR product was determined to be O<sub>2</sub> instead of H<sub>2</sub>O<sub>2</sub> was detected, suggesting that the source of H<sub>2</sub>O<sub>2</sub> generation was from WOR.

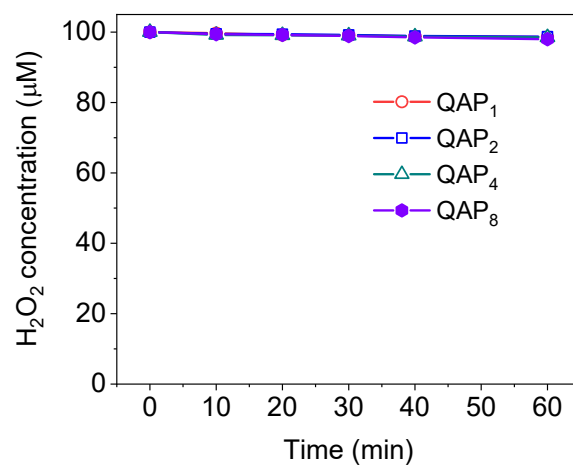

**Fig. S5** The investigation for the decomposition of H<sub>2</sub>O<sub>2</sub> by QAPs under illumination. Conditions: 10 mg catalysts, 50 mL water, 100 µM H<sub>2</sub>O<sub>2</sub>, 3 mM NaIO<sub>3</sub>, Ar (1 bar),  $\lambda > 420$  nm (Xe lamp, 100 mW/cm<sup>2</sup>).

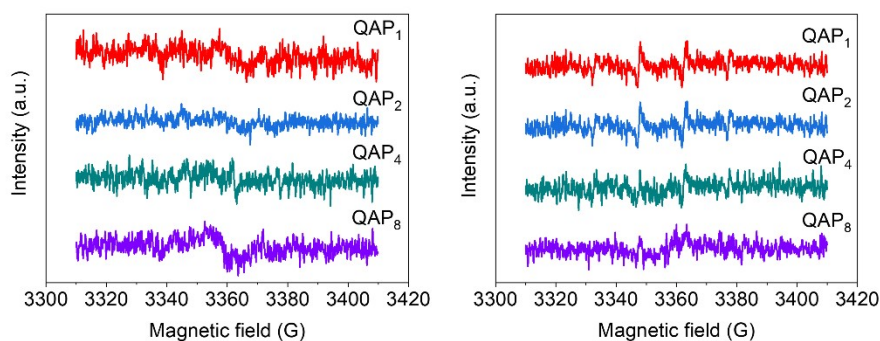

**Fig. S6** The measurement of ROS species (a)  $O_2^{\bullet-}$  and (b)  $^{\bullet}OH$  by EPR during the photosynthesis of  $H_2O_2$ .

We used 5,5-dimethyl-1-pyrroline-N-oxide (DMPO) and 2,2,6,6-tetramethyl-4-piperidinoe (TEMP) as the spin-trap agents for the detection of  $O_2^{\bullet-}$  and (b)  $^{\bullet}OH$ , in EPR, respectively. After 5 min illumination, the inconspicuous quadruple peak signals of DMPO- $^{\bullet}OH$  (1:2:2:1) for all QAPs excluded the formation of  $^{\bullet}OH$  and its contribution to  $H_2O_2$  production. The detected signal intensities of DMPO- $O_2^{\bullet-}$  were also minimal, disclosing the generation pathway of  $H_2O_2$  from single electron-transfer as reported previously.

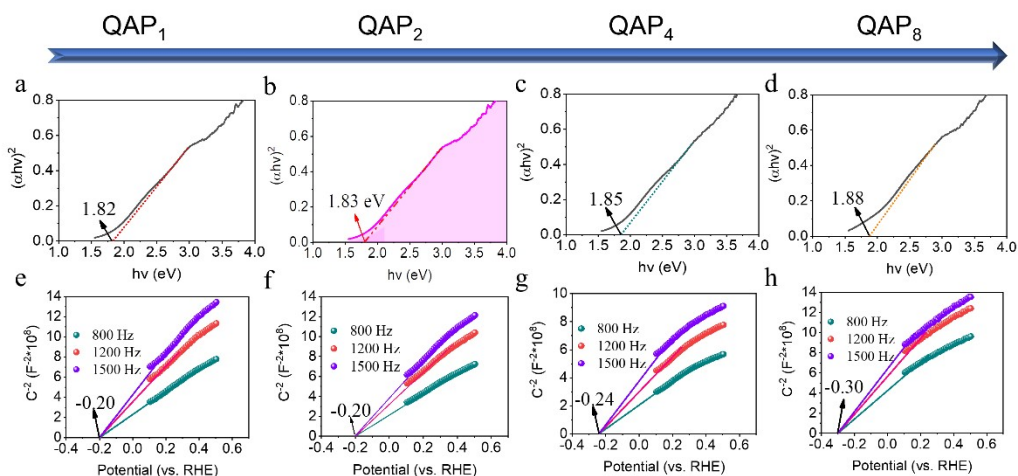

**Fig. S7** Tauc plots (a-d), and Mott-Schottky curves (e-h) measured in 0.5 M Na<sub>2</sub>SO<sub>4</sub> solution.

The bandgaps were calculated to be in the range from 1.82 to 1.88 eV, much lower than some artificial semiconductors (e.g., C<sub>3</sub>N<sub>4</sub>, COFs).<sup>3,4</sup> The positive tangent slope in Tauc plot indicates that the polymer is a n-type semiconductor. Together with the Mott–Schottky testing results, the conduction band (CB) and the valence band (VB) positions were calculated, respectively. Based on the band levels, it can be determined that QAPs favored ORR to produce H<sub>2</sub>O<sub>2</sub> (H<sub>2</sub>O<sub>2</sub>/O<sub>2</sub>, 0.67 V) and WOR to produce O<sub>2</sub> (H<sub>2</sub>O/O<sub>2</sub>, 1.23 V) but not for H<sub>2</sub>O<sub>2</sub> (H<sub>2</sub>O/H<sub>2</sub>O<sub>2</sub>, 1.73 V).

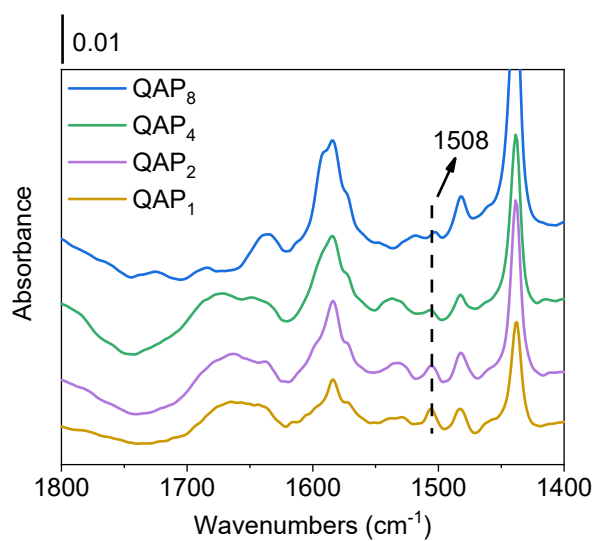

**Fig. S8** In situ IR spectra for pyridine adsorbed on QAPs collected at room temperature.

Pyridine is generally used as probe to detect the Brønsted or Lewis acid sites on the catalysts. Based on the literature,<sup>5,6</sup> the peaks located at 1508 cm<sup>-1</sup> can be assigned to the adsorption of pyridine on a Brønsted acid site. The intensities of these peaks decrease with the increase in BQ/DBA ratio from QAP<sub>1</sub> to QAP<sub>8</sub>.

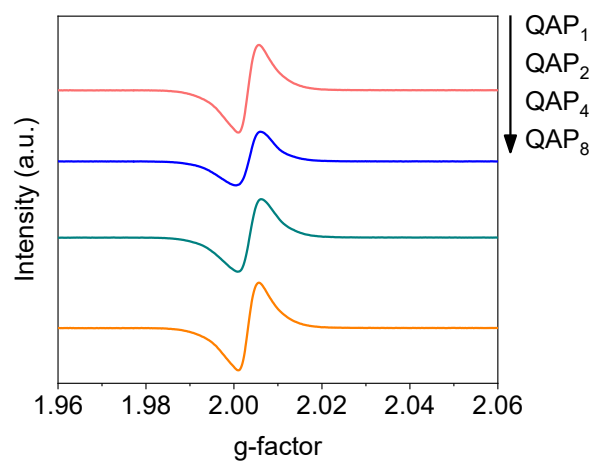

**Fig. S9** The electron paramagnetic resonance (EPR) spectra of the QAPs in the dark conditions.

**Table S1.** Specific surface area of the samples and the pore size fitted through BJH model.

| Photocatalysts   | Surface Area<br>(m <sup>2</sup> /g) | Pore Volume<br>(cc/g) | Pore Diameter Dv(d)<br>(nm) |
|------------------|-------------------------------------|-----------------------|-----------------------------|
| QAP <sub>1</sub> | 18.672                              | 0.150                 | 3.390                       |
| QAP <sub>2</sub> | 15.314                              | 0.102                 | 3.391                       |
| QAP <sub>4</sub> | 16.076                              | 0.118                 | 3.392                       |
| QAP <sub>8</sub> | 19.896                              | 0.127                 | 3.395                       |



**Table S2.** Comparison of metal-free polymer-based photocatalysts for non-sacrificial H<sub>2</sub>O<sub>2</sub> production.

| Photocatalysts                      | H <sub>2</sub> O <sub>2</sub> production<br>( $\mu\text{mol/g/h}$ ) | Light source/<br>Volume of solution                    | Conditions                        | Reference        |
|-------------------------------------|---------------------------------------------------------------------|--------------------------------------------------------|-----------------------------------|------------------|
| <b>QAP<sub>2</sub></b>              | <b>380</b>                                                          | <b><math>\lambda &gt; 420 \text{ nm}</math>, 50 mL</b> | <b>Air, H<sub>2</sub>O</b>        | <b>This work</b> |
| PEI/C <sub>3</sub> N <sub>4</sub>   | 20.8                                                                | AM 1.5G, N.A.                                          | O <sub>2</sub> , H <sub>2</sub> O | 7                |
| Dc-CTF                              | 322                                                                 | $\lambda > 350 \text{ nm}$ , 50 mL                     | O <sub>2</sub> , H <sub>2</sub> O | 8                |
| CNP-s                               | 343.2                                                               | $\lambda > 420\text{nm}$ , 30 mL                       | O <sub>2</sub> , H <sub>2</sub> O | 9                |
| Resin                               | 82                                                                  | $\lambda > 420\text{nm}$ , 30 mL                       | O <sub>2</sub> , H <sub>2</sub> O | 10               |
| Py-Bpy-COF                          | 241                                                                 | N.A., 10 mL                                            | O <sub>2</sub> , H <sub>2</sub> O | 11               |
| OCN-500                             | 106                                                                 | $\lambda > 420\text{nm}$ , 15 mL                       | O <sub>2</sub> , H <sub>2</sub> O | 12               |
| NMT400                              | 270                                                                 | AM1.5G, 50 mL                                          | O <sub>2</sub> , H <sub>2</sub> O | 13               |
| 5Cv@g-C <sub>3</sub> N <sub>4</sub> | 125                                                                 | $\lambda > 420\text{nm}$ , 10 mL                       | O <sub>2</sub> , H <sub>2</sub> O | 14               |
| rGO@MRF                             | 86                                                                  | $\lambda > 420\text{nm}$ , 100 mL                      | O <sub>2</sub> , H <sub>2</sub> O | 15               |
| KCN-0.7                             | 104                                                                 | $\lambda > 420\text{nm}$ , 50 mL                       | O <sub>2</sub> , H <sub>2</sub> O | 16               |
| CHF-DPDA                            | 69                                                                  | $\lambda > 420\text{nm}$ , 20 mL                       | O <sub>2</sub> , H <sub>2</sub> O | 17               |
| FS-COFs                             | 1501.6                                                              | $\lambda > 420\text{nm}$ , 20 mL                       | O <sub>2</sub> , H <sub>2</sub> O | 18               |
| HEP-TAPT-COF                        | 1750                                                                | $\lambda > 420\text{nm}$ , 100 mL                      | O <sub>2</sub> , H <sub>2</sub> O | 19               |
| TPE-AC                              | 293                                                                 | $\lambda > 400\text{nm}$ , 20 mL                       | Air, H <sub>2</sub> O             | 20               |
| RF-resin                            | 160                                                                 | $\lambda > 400\text{nm}$ , 50 mL                       | Air, H <sub>2</sub> O             | 21               |
| OPCN                                | 50                                                                  | $\lambda > 400\text{nm}$ , 50 mL                       | Air, H <sub>2</sub> O             | 22               |

N.A.: not-available

## References

- 1 H. Bader, V. Sturzenegger and J. Hoigné, *Water Res.*, 1988, **22**, 1109–1115.
- 2 H. Tan, P. Zhou, M. Liu, Q. Zhang, F. Liu, H. Guo, Y. Zhou, Y. Chen, L. Zeng, L. Gu, Z. Zheng, M. Tong and S. Guo, *Nat. Synth*, 2023, **2**, 557–563.
- 3 C. Ayed, J. Yin, K. Landfester and K. Zhang, *Angew. Chem. Int. Ed.*, 2023, **62**, e202216159.
- 4 R. Tang, D. Gong, Y. Zhou, Y. Deng, C. Feng, S. Xiong, Y. Huang, G. Peng, L. Li and Z. Zhou, *Appl. Catal., B*, 2022, **303**, 120929.
- 5 J. An, Y. Wang, J. Lu, J. Zhang, Z. Zhang, S. Xu, X. Liu, T. Zhang, M. Gocyla, M. Heggen, R. E. Dunin-Borkowski, P. Fornasiero and F. Wang, *J. Am. Chem. Soc.*, 2018, **140**, 4172–4181.
- 6 L. Ding, M. Li, Y. Zhao, H. Zhang, J. Shang, J. Zhong, H. Sheng, C. Chen and J. Zhao, *Appl. Catal., B*, 2020, **266**, 118634.
- 7 X. Zeng, Y. Liu, Y. Kang, Q. Li, Y. Xia, Y. Zhu, H. Hou, M. H. Uddin, T. R. Gengenbach, D. Xia, C. Sun, D. T. McCarthy, A. Deletic, J. Yu and X. Zhang, *ACS Catal.*, 2020, **10**, 3697–3706.
- 8 C. Wu, Z. Teng, C. Yang, F. Chen, H. B. Yang, L. Wang, H. Xu, B. Liu, G. Zheng and Q. Han, *Adv. Mater.*, 2022, e2110266.
- 9 H. Yang, C. Li, T. Liu, T. Fellowes, S. Y. Chong, L. Catalano, M. Bahri, W. Zhang, Y. Xu, L. Liu, W. Zhao, A. M. Gardner, R. Clowes, N. D. Browning, X. Li, A. J. Cowan and A. I. Cooper, *Nat. Nanotechnol.*, 2023, **18**, 307–315.
- 10 Y. Shiraishi, T. Takii, T. Hagi, S. Mori, Y. Kofuji, Y. Kitagawa, S. Tanaka, S. Ichikawa and T. Hirai, *Nat. Mater.*, 2019, **18**, 985–993.
- 11 J. Sun, H. Sekhar Jena, C. Krishnaraj, K. Singh Rawat, S. Abednatanzi, J. Chakraborty, A. Laemont, W. Liu, H. Chen, Y.-Y. Liu, K. Leus, H. Vrielinck, V. van Speybroeck and P. van der Voort, *Angew. Chem. Int. Ed.*, 2023, **62**, e202216719.
- 12 Z. Wei, M. Liu, Z. Zhang, W. Yao, H. Tan and Y. Zhu, *Energy Environ. Sci.*, 2018, **11**, 2581–2589.
- 13 C. Yang, S. Wan, B. Zhu, J. Yu and S. Cao, *Angew. Chem. Int. Ed.*, 2022, **61**, e202208438.
- 14 L. Chen, C. Chen, Z. Yang, S. Li, C. Chu and B. Chen, *Adv. Funct. Mater.*, 2021, **31**, 2105731.
- 15 Q. Tian, X.-K. Zeng, C. Zhao, L.-Y. Jing, X.-W. Zhang and J. Liu, *Adv. Funct. Mater.*, 2023, **33**, 2213173.
- 16 J. Yue, H. Yang, C. Liu, Q. Zhang and Y. Ao, *Appl. Catal., B*, 2023, **331**, 122716.
- 17 H. Cheng, H. Lv, J. Cheng, L. Wang, X. Wu and H. Xu, *Adv. Mater.*, 2022, **34**, e2107480.
- 18 Y. Luo, B. Zhang, C. Liu, D. Xia, X. Ou, Y. Cai, Y. Zhou, J. Jiang and B. Han, *Angew. Chem. Int. Ed.*, 2023, e202305355.
- 19 D. Chen, W. Chen, Y. Wu, L. Wang, X. Wu, H. Xu and L. Chen, *Angew. Chem. Int. Ed.*, 2022, e202217479.

- 20 Y.-X. Ye, J. Pan, Y. Shen, M. Shen, H. Yan, J. He, X. Yang, F. Zhu, J. Xu, J. He and G. Ouyang, *Proc. Natl. Acad. Sci. U.S.A.*, 2021, **118**, e2115666118.
- 21 X. Zhang, J. Wang, B. Xiao, Y. Pu, Y. Yang, J. Geng, D. Wang, X. Chen, Y. Wei, K. Xiong and Y. Zhu, *Appl. Catal., B*, 2022, **315**, 121525.
- 22 F. Wang, J. Xu, Z. Wang, Y. Lou, C. Pan and Y. Zhu, *Appl. Catal., B*, 2022, **312**, 121438.
